# Supplementary material for: Directed Evolution Reveals Unexpected Epistatic Interactions That Alter Metabolic Regulation and Enable Anaerobic Xylose Use by Saccharomyces cerevisiae
Source: PLoS Genet. 2016 Oct 14;12(10):e1006372. doi: 10.1371/journal.pgen.1006372 (PMC5065143; doi:10.1371/journal.pgen.1006372)
Supplement: S3 Appendix — (XLSX) [file pgen.1006372.s014.xlsx]

## Sheet: Overview
S3 Appendix. Gene Ontology term enrichment P values for proteins of differential abundance between strains.
Each worksheet corresponds to a particular comparison for each Venn diagram from S7 Fig.
S7 Fig is represented here and each section on each Venn diagram is assigned a letter identification, which corresponds to the worksheet.
The worksheets contain the proteins with differential abundance using edgeR (FDR < 0.05) as well as the Biological Component and Cellular Component GO enrichments from FunSpec (http://funspec.med.utoronto.ca). Information on FunSpec can be found at http://funspec.med.utoronto.ca.

## Sheet: A
Comparing Protein Overlap - Increasing Protein in YPX aerobic, S7A Fig
Y127MR vs Y22-3MR; Y22-3MR isu1D vs Y22-3MR; Y22-3 MR hog1D isu1D vs Y22-3MR isu1D
GROUP A		FunSpec - Biological
CpXylA		Category	p-value	In Category from Cluster
YNL247W		mitochondrial translation [GO:0032543]	2.943e-07	MRP21 MRPL36 MRPS5 MRPS35 MRPL31 RSM22 SLS1 MRPL15 NAM2 MRPL4 MRP7 MRPS12 IFM1 PET123 ISM1 MRP51
YJR070C		mitochondrial translational initiation [GO:0070124]	1.211e-05	MRP21 AEP2 IFM1 MRP51
YOR206W		establishment or maintenance of cell polarity [GO:0007163]	0.0002454	DNF2 DNF1 CBK1
YDR381W		tRNA aminoacylation for protein translation [GO:0006418]	0.0003874	MSW1 MST1 NAM2 YNL247W ISM1 MSY1 MSF1
YDL040C		post-Golgi vesicle-mediated transport [GO:0006892]	0.0005953	DRS2 SUR4 KES1
YOL049W		protein insertion into mitochondrial membrane from inner side [GO:0032979]	0.0005953	MBA1 OXA1 PNT1
YLL036C		N-glycan processing [GO:0006491]	0.0005953	KTR3 MNN10 KTR1
YPL210C
YBR052C		FunSpec - Cellular Component
YGR210C		Category	p-value	In Category from Cluster
YBL032W		mitochondrion [GO:0005739]	2.189e-12	FUN30 MRP21 COQ1 CDS1 SCO1 MRPL36 MBA1 RIM2 MRPS5 NAT1 MTF2 RPO21 CRD1 DLD2 YDR061W COX20 MSW1 OMS1 BCS1 AFG1 CHO1 PET117 OXA1 CHD1 DNF1 RPO41 RMD9 MTC3 CCM1 MRPS35 MAS2 NAM8 AIM46 FMC1 COA1 AIM22 IML2 MEF2 NUC1 AIM24 IBA57 CMC1 MRPL31 SDH3 RSM22 MST1 SAC1 PRP19 REX2 SLS1 MAS1 GUF1 MRPL15 NAM2 ATP10 MRPL4 FMP27 AIM31 RPM2 CCS1 YTA12 AIM36 MTF1 AEP2 PET8 MRP7 PSD1 TIM23 MRPS12 YNR040W COQ10 IFM1 Y…
YJR080C		mitochondrial inner membrane [GO:0005743]	2.986e-08	COQ1 SCO1 MBA1 RIM2 CRD1 COX20 OMS1 BCS1 AFG1 PET117 OXA1 RMD9 COA1 NUC1 CMC1 SDH3 SLS1 GUF1 ATP10 CCS1 YTA12 PET8 PSD1 TIM23 COQ10 ODC2 PNT1
YOR074C		mitochondrial matrix [GO:0005759]	3.089e-05	MTF2 DLD2 MSW1 RPO41 MAS2 FMC1 IBA57 MST1 MAS1 GUF1 NAM2 MTF1 ISM1 MSY1 MSF1
YDL140C		Golgi apparatus [GO:0005794]	3.665e-05	DRS2 ARL1 KTR4 YCR043C MNN10 AKR1 ANP1 YPT31 DNF1 SFB3 SEC28 MNN5 PTM1 MCD4 CCC1 TVP18 YIP3 PEP12 KTR1 TRS33 SNX3 MNN9
YDR231C		membrane [GO:0016020]	9.499e-05	ERP2 DRS2 APL3 COQ1 CHS3 CDS1 SCO1 FAT1 RFS1 IFA38 SEC66 MBA1 RIM2 KTR4 KTR3 FTH1 SSH1 CRD1 LCB2 DNF2 COX20 MNN10 AKR1 OMS1 BCS1 ANP1 UTR2 CHO1 YPT31 OXA1 DNF1 FET5 YFL042C STT3 RMD9 AIM14 YGR026W GPA1 SFB3 SEC28 RHO3 COA1 SEC11 OST1 IML2 NUC1 APL1 GEA1 STE18 PMT4 PTM1 VPH2 CMC1 SDH3 SRP102 MCD4 PEX1 SAC1 DID2 FPS1 SLS1 CCC1 CDC42 GUF1 SUR4 SEC61 ATP10 VMA6 AIM31 GSF2 TVP18 YTA12 YMR134W AIM36 LC…
YJR069C		endoplasmic reticulum [GO:0005783]	0.0001045	ERP2 CDS1 FAT1 IFA38 SEC66 SSH1 LCB2 MNN10 YDR476C ANP1 CHO1 MSC7 SFB3 SEC11 OST1 PMT4 VPH2 SRP102 MCD4 SAC1 SUR4 SEC61 GSF2 YMR134W LCB1 YIP3 PDR16 ERP4 TRS33 MPD1 MNN9 PGC1 SRP72
YJL082W		Golgi membrane [GO:0000139]	0.0002157	AKR1 ANP1 YPT31 SFB3 SEC28 PTM1 MCD4 CCC1 TVP18 YIP3 KTR1 SNX3 MNN9 KES1
YPR019W		mitochondrial small ribosomal subunit [GO:0005763]	0.0002635	MRP21 MRPS5 MRPS35 RSM22 MRPS12 PET123 MRP51
YOL012C		DNA-directed RNA polymerase II, core complex [GO:0005665]	0.0009589	RPB5 RPO21 RPB10 RPO26
YHR052W
YDR101C
YDR399W
YOR112W
YPL031C
YLR002C
YGR165W
YKL112W
YML048W
YNL307C
YKR002W
YBR247C
YPL145C
YDL141W
YHR043C;YHR044C
YNL004W
YBR037C
YBR283C
YGL022W
YIL157C
YLR229C
YML030W
YDR061W
YMR089C
YLR129W;REV__YKR084C
YPL118W
YEL055C
YGR279C
YNL229C
YPR047W
YIR004W
YBL037W
YPL032C
YOR354C
YPL128C
YMR134W
YDL178W
YGL160W
YBR159W
YPL217C
YIL076W
YDR335W
YPR187W
YLR071C
YHR039C
YNL147W
YNL005C
YNR017W
YJL002C
YBR022W
YNL161W
YEL052W
YMR157C
YBL023C
YKR081C
YBR171W
YER031C
YLR220W
YIL106W
YLR163C
YHR098C
YDR476C
YMR216C
YHR005C
YJL186W
YBR164C
YGL107C
YKL212W
YMR296C
YJL208C
YHR112C
YOR099W
YBL090W
YEL040W
YBR154C
YLR447C
YIR022W
YOR158W
YER164W
YOR131C
YHR121W
YCL037C
YDR316W
YBR122C
YMR071C
YHR068W
YIL098C
YGL115W
YGR017W
YJL033W
YIL128W
YMR044W
YJR143C
YOR108W
YOR357C
YGL201C
YAL026C
YPL140C
YPL050C
YBR251W
YER166W
YKR035W-A
YLR177W
YBR172C
YKL032C
YBR185C
YPL232W
YNL085W
YBR003W
YNR036C
YKL165C
YNL154C
YLR439W
YJL055W
YKL039W
YML050W
YIR030C
YNL001W
YLR357W
YLR312W-A
YBR103W
YHR163W
GTK30D04150
YFL041W
YLR059C
YOR043W
YFL017C
YOR115C
YPL266W
YDL064W
YPL097W
YKL194C
YLR378C
YOR236W
YMR043W
YJL125C
YLR393W
YNR040W
YLR321C
YKL154W
YLR372W
YBR192W
YOR266W
YHR024C
YPR111W
YOL023W
YDL224C
YPR139C
YDL142C
YDR062W
YLR139C
YGR150C
YKL141W
YDR264C
YOL070C
YIL074C
YNL044W
YAL007C
YMR282C
YGL050W
YNL231C
YOR022C
YDL219W
YFL042C
YBR041W
YBR207W
YKL138C
YAL019W
YOR036W
YHR199C
YIL118W
YAL025C
YBR205W
YDR397C
YKL119C
YPL040C
YEL036C
YKL206C
YJR122W
YKL128C
YMR312W
YER154W
YER002W
YKL144C
YML097C
YJR005W
YLL043W
YOL008W
YLR425W
YDR510W
YHR154W
YPL224C
YDR251W
YDL044C
YBR029C
YBR199W
YDR248C
YOR244W
YDR424C
YJL102W
YMR228W
YLR454W
YOR288C
YOR016C
YDR093W
YGL226W
YDR375C
YOR222W
YHR086W
YDL102W
YDR268W
YLR382C
YNL169C
YER058W
YKL137W
YJR031C
YKL022C
YJR086W
YPL082C
YGR271C-A
YFL036W
YPL206C
YMR038C
YGR058W
YNL003C
YIL009W
YDR245W
YOR373W
YJL046W
YBR023C
YHR084W
YER026C
YPR030W
YCR043C
YKL155C
YLR289W
YML091C
YLR455W
YHR165C
YCR102C
YKL164C;YJL160C
YHR167W
YKL197C
YGR026W
YOR274W
YOR210W
YIL079C
YPL171C
YOR375C

## Sheet: B
Comparing Protein Overlap - Increasing Protein in YPX aerobic, S7A Fig
Y127MR vs Y22-3MR; Y22-3MR isu1D vs Y22-3MR; Y22-3 MR hog1D isu1D vs Y22-3MR isu1D
GROUP B		FunSpec - Biological
YDL205C		Category	p-value	In Category from Cluster
YMR009W		glycerol biosynthetic process [GO:0006114]	7.244e-05	HOR2 RHR2
YPL013C
YOL030W
YGL106W
YOR271C
YML079W
YER057C
YMR225C
YML094W
YHR059W
YLR061W
YHR100C
YHR049W
YHR091C
YFR049W
YPL120W
YEL066W
YER095W
YDR054C
YLR292C
YDR381C-A
YKR087C
YIL053W
YIL026C
YPL088W
YJR092W
YDR385W
YER062C
YGR287C;Homologue_YGR292W
YGR179C
YHR092C
YPL109C
YOR348C

## Sheet: C
Comparing Protein Overlap - Increasing Protein in YPX aerobic, S7A Fig
Y127MR vs Y22-3MR; Y22-3MR isu1D vs Y22-3MR; Y22-3 MR hog1D isu1D vs Y22-3MR isu1D
GROUP C		FunSpec - Biological
YCL018W		Category	p-value	In Category from Cluster
YGL125W		NADH metabolic process [GO:0006734]	0.0007572	NPY1
YKL120W		isopropylmalate transport [GO:0034659]	0.0007572	OAC1
YER053C		oxaloacetate transport [GO:0015729]	0.0007572	OAC1
YGL067W
kanR

## Sheet: D
Comparing Protein Overlap - Increasing Protein in YPX aerobic, S7A Fig
Y127MR vs Y22-3MR; Y22-3MR isu1D vs Y22-3MR; Y22-3 MR hog1D isu1D vs Y22-3MR isu1D
GROUP D		FunSpec - Biological
YLR262C		Category	p-value	In Category from Cluster
YMR039C		mitochondrial translation [GO:0032543]	<1e-14	VAR1 PET112 MRPS9 IMG1 IMG2 MRPL11 RSM10 RSM24 MRPL7 MRPL35 MRPS28 MRP1 RSM23 MRPL25 MRP4 MRPL6 RSM25 MRPL8 MRPL49 RSM26 RSM7 MRP17 MRP49 MRPL13 MRPL39 YML6 MRPL3 MRPS8 MRPS17 MRPL33 MSK1 SWS2 NAM9 MRPL22 MRPL19 MRPL17 MRPS18 RSM19 MRP2
YDL130W		translation [GO:0006412]	1.688e-08	VAR1 PET112 MRPS9 IMG1 IMG2 RPP1B RSM10 MRPL7 MRPS28 RSM28 AIM10 MNP1 MSM1 MRP4 RPF1 MRPL6 RSM25 MRPL8 MRPL49 RSM7 MRP17 MRPL39 YML6 MRPS8 MRPS17 MRPL33 RLP7 RPL9B MSK1 SWS2 MRPL22 MRPL19 SUI1 MRPS18 RSM19 MRP2
YBR034C		proton transport [GO:0015992]	4.686e-08	TIM11 ATP17 VMA7 VMA10 ATP14 ATP18 STV1 AIM37 ATP19 ATP15 ATP20 YLH47
YDR494W		ion transport [GO:0006811]	1.27e-06	MRH1 ENA1 TIM11 ATP17 VMA7 VMA10 ATP14 CTR3 ATP18 STV1 FET3 AIM37 ATX1 ATP19 ATP15 ATP20 CTR1
YDR296W		ATP synthesis coupled proton transport [GO:0015986]	2.419e-06	TIM11 ATP17 ATP14 ATP18 ATP19 ATP15 ATP20
YNL131W		oxidation-reduction process [GO:0055114]	1.47e-05	TSC10 COX9 HEM13 SUR2 MRP1 RNR1 ALD5 SER3 ERG4 YGL039W ERG25 COQ6 NCP1 PAN5 RSM26 MAE1 ERG27 COX8 ERG5 FET3 COX7 SCS7 COX5A CYC2 CAT5 TYW1 ERV2
YLR248W		mitochondrial proton-transporting ATP synthase complex assembly [GO:0033615]	2.345e-05	ATP12 ATP14 ATP18 ATP25 ATP19
YOR165W		ATP biosynthetic process [GO:0006754]	2.447e-05	ENA1 TIM11 ATP17 ATP14 ATP18 ATP19 ATP15 ATP20
YHR147C		aerobic respiration [GO:0009060]	2.948e-05	PET100 MNP1 COX13 QCR10 QCR8 PUF3 COQ9 COQ5 MIC17 PPA2 COX11
YGL078C;REV__YHR056C		cytochrome c-heme linkage [GO:0018063]	6.764e-05	CYC3 CYT2 CYC2
YER087W		protein targeting to mitochondrion [GO:0006626]	6.888e-05	TIM9 MSP1 TIM13 TIM10 TIM8
YKL167C		ubiquinone biosynthetic process [GO:0006744]	6.888e-05	COQ4 COQ6 COQ9 COQ5 CAT5
YDR175C		lipid biosynthetic process [GO:0008610]	0.0002191	SUR2 ERG4 ERG25 NCP1 ACP1 ERG27 ERG5 SCS7 IDI1
YER126C		protein import into mitochondrial inner membrane [GO:0045039]	0.0002928	TIM9 TIM13 TIM10 TIM8
YDL104C		steroid biosynthetic process [GO:0006694]	0.0004058	ERG4 ERG25 NCP1 ERG27 ERG5 IDI1
YPR154W		transport [GO:0006810]	0.0005884	PHO88 CTP1 GGC1 SNQ2 ENA1 YDR286C TIM11 ATP17 GNP1 TIM9 NTF2 GET2 KAP114 VMA7 ACB1 TIM13 SDA1 MTM1 QCR10 TIM10 VMA10 SBE22 ALB1 QCR8 ATG27 NUP85 TIM8 ACP1 MRS4 PAM17 TRX1 YPT6 ATP14 CSR1 CTR3 ATP18 STV1 FET3 SCS7 AIM37 TOM22 ATX1 ATP19 PDR5 COT1 PDR12 TIM50 ATP15 AIM45 YPR011C ATP20 CTR1
YBR109C		cristae formation [GO:0042407]	0.000636	TIM11 ATP14 ATP20
YGR235C
YKL029C		FunSpec - Cellular Component
YML106W;YMR271C		Category	p-value	In Category from Cluster
YBR252W		mitochondrial small ribosomal subunit [GO:0005763]	<1e-14	VAR1 MRPS9 RSM10 RSM24 MRPS28 MRP1 RSM28 RSM23 MRP4 RSM25 RSM26 RSM7 MRP17 MRPS8 MRPS17 SWS2 NAM9 MRPS18 RSM19 MRP2
YPR165W		mitochondrial large ribosomal subunit [GO:0005762]	<1e-14	IMG1 IMG2 MRPL11 MRPL7 MRPL35 MRPL25 MRPL6 MRPL8 MRPL49 MRP49 MRPL13 MRPL39 YML6 MRPL3 MRPL33 MRPL22 MRPL19 MRPL17
YOR211C		mitochondrial inner membrane [GO:0005743]	<1e-14	CYC3 CMC2 TCM62 CTP1 COX9 GGC1 PET100 COQ4 TIM11 ATP17 TIM9 COX13 TIM13 COQ6 MTM1 QCR10 TIM10 QCR8 TIM8 CYT2 MRS4 PAM17 COQ9 MSS51 ATP14 COX8 COX14 ATP25 YHM2 COX7 COX5A ATP19 CYC2 CAT5 MGM1 TIM50 COX11 ATP15 YPR011C YME1 YLH47
YFR011C		mitochondrion [GO:0005739]	<1e-14	VAR1 CYC3 FUS3 CMC2 PET112 TCM62 PHO88 MRPS9 AIM5 FMP21 CTP1 YCL057C-A IMG1 IMG2 COX9 QRI7 STF1 INH1 GGC1 MRPL11 SNQ2 MRH1 RSM10 PET100 TRM1 RSM24 MSS116 COQ4 HEM1 MRPL7 MHR1 TIM11 MRPL35 MRPS28 MRP1 ATP17 RSM28 GNP1 ACN9 TIM9 ISD11 ALD5 AIM10 CCA1 AIM13 GEP7 MNP1 RSM23 COX13 MTO1 YGR021W MSP1 MRPL25 NAT2 MSM1 TIM13 YGR235C COQ6 MTM1 MRP4 QCR10 TIM10 NCP1 MRPL6 RSM25 MRPL8 MRPL49 QCR8 ATG27 ATP12…
YHR042W		ribonucleoprotein complex [GO:0030529]	1.588e-14	VAR1 LSM2 MRPS9 PBP2 IMG1 IMG2 RPP1B MRPL11 RSM10 RSM24 MRPL7 MRPL35 MRPS28 MRP1 RSM28 MNP1 RSM23 MRPL25 MRP4 MRPL6 RSM25 MRPL8 MRPL49 RSM26 RSM7 MRP17 MRP49 MRPL13 SOF1 MRPL39 YML6 MRPL3 MRPS8 MRPS17 MRPL33 RPL9B SWS2 NAM9 MRPL22 MRPL19 MRPL17 MRPS18 RSM19 MRP2 SMX3
YGL129C		ribosome [GO:0005840]	1.36e-13	VAR1 MRPS9 IMG1 IMG2 RPP1B MRPL11 RSM10 RSM24 MRPL7 YDR266C MRPL35 MRPS28 MRP1 RSM28 MNP1 RSM23 MRPL25 MRP4 MRPL6 RSM25 MRPL8 MRPL49 ALB1 RSM26 RSM7 MRP17 MRP49 MRPL13 MRPL39 YML6 MRPL3 MRPS8 MRPS17 MRPL33 RLP7 RPL9B SWS2 NAM9 MRPL22 MRPL19 MRPL17 MRPS18 RSM19 MRP2
YER148W		membrane [GO:0016020]	9.001e-08	PMT2 CYC3 CMC2 MNN2 TCM62 PHO88 AIM5 TSC10 CTP1 YCL057C-A SLC1 COX9 PMT1 GGC1 SNQ2 MRH1 ENA1 PET100 COQ4 SUR2 TIM11 ATP17 KRE2 GNP1 TIM9 GDA1 GET2 ERJ5 ERG4 ERV14 GEP7 COX13 MSP1 GSC2 ERG25 TIM13 COQ6 MTM1 ERV29 QCR10 TIM10 NCP1 QCR8 ATG27 MNN11 NUP85 HOC1 CDC11 YJR085C TIM8 DCW1 CYT2 MNN4 UTH1 MRS4 PAM17 PUF3 TRX1 FMP25 ERG27 COQ9 MSS51 YPT6 ATP14 FKS1 COX8 CTR3 NTE1 ATP18 COX14 STV1 FET3 ATP25 …
YOL052C		integral to membrane [GO:0016021]	2.349e-07	PMT2 MNN2 TCM62 PHO88 AIM5 TSC10 CTP1 YCL057C-A SLC1 COX9 PMT1 GGC1 SNQ2 MRH1 ENA1 PET100 SUR2 TIM11 KRE2 GNP1 TIM9 GDA1 NTF2 GET2 ERJ5 ERG4 ERV14 GEP7 COX13 KAP114 VMA7 MSP1 GSC2 ERG25 TIM13 MTM1 ERV29 QCR10 TIM10 NCP1 QCR8 ATG27 MNN11 NUP85 HOC1 YJR085C TIM8 MNN4 MRS4 PAM17 COX12 FMP25 ATP14 FKS1 COX8 CTR3 NTE1 ATP18 COX14 STV1 FET3 YHM2 COX7 SCS7 COX5A TCB2 TOM22 LEM3 AIM39 ATP19 PDR5 SEY1 MGM…
YCR046C		proton-transporting ATP synthase complex, coupling factor F(o) [GO:0045263]	1.719e-06	TIM11 ATP17 ATP14 ATP18 ATP19 ATP20
YIL093C		mitochondrial proton-transporting ATP synthase complex, coupling factor F(o) [GO:0000276]	1.719e-06	TIM11 ATP17 ATP14 ATP18 ATP19 ATP20
YDR044W		mitochondrial respiratory chain complex IV [GO:0005751]	3.321e-06	COX9 COX13 COX12 COX8 COX7 COX5A
GTK30I00160		mitochondrial membrane [GO:0031966]	4.137e-06	AIM5 PET100 GNP1 GEP7 ATG27 FMP25 ATP18 COX14 AIM39 COT1 FMP30 ATP20
YLR077W		mitochondrial intermembrane space protein transporter complex [GO:0042719]	1.324e-05	TIM9 TIM13 TIM10 TIM8
YOL115W;YNL299W		mitochondrial intermembrane space [GO:0005758]	2.505e-05	CYC3 CMC2 ACN9 TIM13 CYT2 COX19 MIC17 MGM1 ISA2
YIL062C		intracellular [GO:0005622]	2.861e-05	MRPS9 IMG1 IMG2 RPP1B MRPL11 RSM10 MRPL7 YDR266C MRPS28 NTF2 BUR6 MNP1 MRP4 MRPL6 MRPL8 MRPL49 RSM7 MRPL39 MRPL3 MRPS8 MRPS17 NGL2 MRPL33 RLP7 RPL9B SWS2 NAM9 MRPL22 MRPS18 NOG2 SUR1 RHO1 MRP2
YHR039C-A		mitochondrial matrix [GO:0005759]	0.0001551	MSS116 HEM1 ISD11 ALD5 CCA1 MSM1 MAE1 COQ5 COX14 MSK1 EMI5 GRX5 AIM45 ISA2
YML025C		1,3-beta-D-glucan synthase complex [GO:0000148]	0.0002624	GSC2 FKS1 RHO1
YMR286W
YBR106W
YGR076C
YDR322W
YIR012W
YPL063W
YPL117C
YKL087C
YMR158W
YPR004C
YOR360C
YJR075W
YDR337W
YMR076C
YJR076C
YCL057C-A
YJL178C
YBL080C
YPR125W
YER009W
YPL059W
YKR042W
YMR290C
YGL012W
YNL081C
YDL198C
YMR024W
YOR145C
YNL252C
YER073W
YBR015C
YLR203C
YGR171C
YKR006C
YJL096W
YDR465C
YER083C
YOL005C
YNL251C
YBR146W
YDL202W
YNL185C
YGL040C
YPL103C
YHL004W
YOR057W
YDL181W
YOR327C
YNL137C
YDR228C
YNL073W
YOL006C
YDL095W
YGR147C
YDR033W
YDR483W
YMR002W
YGR028W
YNL087W
YOR224C
YPR113W
YPR020W
YDR266C
YML059C
YNL244C
YLL013C
YPR024W
YJL063C
YNL153C
YDR120C
YLR179C
YOL071W
YKL201C
YDR041W
YNL177C
YJL088W
YNL002C
YKR065C
YMR188C
YHR137W
YHR143W-A
YER159C
YMR054W
YER168C
YBR291C
YJR113C
Q0140
YLR435W
YDR508C
YDR079W
YNL100W
YGR111W
YGR284C
YLR100W
YMR267W
YJR100C
YDR237W
YGL191W
YPR182W
YGL241W
YNL323W
YOR370C
YLR380W
YPR188C
YDL031W
YGL171W
YOL124C
YDL052C
YBL016W
YBL059C-A
YDR286C
YNL052W
YPR166C
YDR297W
YAL023C
YOL053W
YDR194C
YDR204W
YLL011W
YBR044C
YNL067W
YPL093W
YMR241W
YDR347W
YGL054C
YJL180C
YBR082C
YLR017W
YHR063C
YMR098C
YOR320C
YOR196C
YBR262C
YFL021W
YAR073W|YAR075W
YJR042W
YPR011C
YOR171C
YNL306W
YML009C
YJL122W
YPR067W
YKL058W
YDR322C-A
YHR103W
YHR088W
YJL183W
YBR233W
YEL042W
YDR130C
YDR040C
YPL132W
YFR041C
YGR245C
YPR037C
YBL033C
YDR511W
YNR053C
YNR037C
YJR101W
YPR073C
YGR257C
YHR001W-A
YBL026W
YJR085C
YOR037W
YJL166W
YDL021W
YLR253W
YML110C
GTK30O04200;GTK30B01620
YDR377W
YGR021W
YLR043C
YBL085W
YOR125C
YGR229C
YKL003C
YLR068W;REV__YLR291C
YGL068W
YGL057C
YLR274W
YAL039C
YNL259C
YPR010C-A
YBR028C
YKL192C
YDL236W
YGR020C
YLL018C-A
YHR005C-A
YOL077W-A
YPL207W
YGR032W
YLR395C
YMR256C
YOR316C
YER048W-A
YMR285C
YMR291W
YDL130W-A
YMR015C
YGR255C
YKL046C
R0040C
YEL020W-A
YCR071C
YPR124W
YNR034W-A
YDR011W
YBR202W
YLR038C
YLR201C
YGR292W;YBR299W
YPL057C
YJR135W-A
YGL039W
YGL236C
YLR295C
YGR037C
YLR342W
YML129C
YGR060W
YBR085C-A
YLR411W
YBR269C
YDR507C
YER070W
YOR283W
R0020C
YGR181W
YER081W
GTK30N00600
YDL067C
YPL271W
YBR265W
YOR153W
YDR232W
YKR052C
YMR058W
YML081C-A
YPL058C
YMR272C

## Sheet: E
Comparing Protein Overlap - Increasing Protein in YPX aerobic, S7A Fig
Y127MR vs Y22-3MR; Y22-3MR isu1D vs Y22-3MR; Y22-3 MR hog1D isu1D vs Y22-3MR isu1D
GROUP E		FunSpec - Biological
YNL111C		Category	p-value	In Category from Cluster
YLL052C;YPR192W		phosphatidylcholine biosynthetic process [GO:0006656]	0.0001278	PCT1 OPI3
YHR018C
YCR026C
YMR202W
YJR073C
YBR097W
YER141W
YGL101W
YGR202C
YCL025C
YFR015C
YIL015W
YGR157W;REV__YGL134W
YER001W

## Sheet: F
Comparing Protein Overlap - Increasing Protein in YPX aerobic, S7A Fig
Y127MR vs Y22-3MR; Y22-3MR isu1D vs Y22-3MR; Y22-3 MR hog1D isu1D vs Y22-3MR isu1D
GROUP G		FunSpec - Biological
YER044C		Category	p-value	In Category from Cluster
YBR145W		lipid biosynthetic process [GO:0008610]	3.743e-05	ERG28 OLE1 ERG3
YPR035W		fatty acid biosynthetic process [GO:0006633]	0.0003762	OLE1 ERG3
YBR177C		ergosterol biosynthetic process [GO:0006696]	0.0004117	ERG28 ERG3
YDR216W		steroid biosynthetic process [GO:0006694]	0.0004875	ERG28 ERG3
YGL055W		sterol biosynthetic process [GO:0016126]	0.0006579	ERG28 ERG3
YLR056W
GTK30G03460;GTK30X00120;GTK30D03460|GTK30D03470
YBR208C
GTK30J01230;GTK30R00130;GTK30L03860;GTK30L03870
YEL046C

## Sheet: G
Comparing Protein Overlap - Decreasing Protein in YPX aerobic, S7A Fig
Y127MR vs Y22-3MR; Y22-3MR isu1D vs Y22-3MR; Y22-3 MR hog1D isu1D vs Y22-3MR isu1D
GROUP H		FunSpec - Biological
YFL014W		Category	p-value	In Category from Cluster
YNL117W		proteasome regulatory particle assembly [GO:0070682]	7.26e-06	RPT2 NAS2 RPT1 RPT5
YER065C		ubiquitin-dependent protein catabolic process [GO:0006511]	4.642e-05	RPT2 UBP5 UFD1 NAS2 YUH1 RPT1 RPT5
YOR388C		sulfate assimilation [GO:0000103]	0.0004113	MET3 MET5 MET14
YIL057C		cysteine biosynthetic process [GO:0019344]	0.0005428	MET3 MET5 MET14
YDR256C		hydrogen peroxide catabolic process [GO:0042744]	0.0005834	CTA1 CCP1
YGR243W
YDL204W		FunSpec - Cellular Component
YKR097W		Category	p-value	In Category from Cluster
kanR		cytoplasm [GO:0005737]	9.557e-07	PTH2 PKC1 NTH2 UGA2 CNS1 RNQ1 RRP43 YCR090C RMD1 RPT2 YPD1 NBP2 RAV2 GLO2 SSD1 PCM1 ICL1 HSP12 OTU1 PYC1 VID30 UPF3 CRG1 NAS2 RGI2 PFK26 IDS2 MET3 YUH1 MET5 MET14 RPT1 DPH2 BNA5 SSP120 CDC25 VRP1 YAP1 YMR114C YMR124W FAA4 MLS1 OPI10 MDY2 CUE5 RPT5 RPS30B SER1 FDH1 GDE1 YPR172W
YBR054W		proteasome regulatory particle, base subcomplex [GO:0008540]	0.0004113	RPT2 RPT1 RPT5
YHR209W
YMR114C
YDR055W
YER054C
YPL079W
YBR230C
YJR010W
YMR240C
YOR113W
YGL080W
YER144C
YLR310C
YKR029C
YMR147W
YDR272W
YGL062W
YLR149C
YKL146W
YLR250W
YGL009C
YKL001C
YHL021C
YCL033C
YGR283C
YEL044W
YKR066C
YBR006W
YOL032W
YMR246W
YKL191W
YDR490C
YBR155W
YJR099W
YDL072C
YPL110C
YER004W
YDL001W
YBR089C-A
YDR202C
YLR231C
YCL028W
YJL146W
YER174C
YER111C
YIL007C
YMR124W
YML007W
YER030W
YOL111C
YBL057C
YIL063C
YCR003W
GTK30J00160
YPR063C
YCR035C
YML074C
YDL235C
YML036W
YKL040C
YOR042W
YBR001C
YFL044C
YIL087C
YGR072W
YDL007W
YMR276W
YDR162C
YJR137C
YDR358W
YGR048W
YIL107C
YOR117W
YLR337C
YKL145W
YOR184W
YGL227W
YBL105C
YOR182C
YCR090C
YEL058W
YPR172W
YOR086C
YER048C
YDR293C

## Sheet: H
Comparing Protein Overlap - Decreasing Protein in YPX aerobic, S7A Fig
Y127MR vs Y22-3MR; Y22-3MR isu1D vs Y22-3MR; Y22-3 MR hog1D isu1D vs Y22-3MR isu1D
GROUP I		FunSpec - Cellular Component
YPL135W;YOR226C		Category	p-value	In Category from Cluster
YDR329C		cytoplasm [GO:0005737]	0.000822	LEU2 PGK1 UBX3 ASP1 GLC3 TMT1 BBC1 PBS2 TPK1 SAM1 MVP1 YMR086W PAH1 SIS1 ATG4 HST2 CAR1 RRD2
YNL311C
YPL171C
YCR102C
YKR094C;YIL148W;YLL039C
YFR043C
YDL091C
YPL015C
YMR153W
YMR231W
YPL152W
YDR229W
YMR165C
YNL223W
YLR180W
YER175C
YJL164C
YCL052C
YNR013C
YPL111W
YCL011C
YOR101W
YMR004W
YOL153C
YEL011W
YMR086W
YCL018W
YJL128C
YDR321W
YNL007C
YJL020C
YCR012W

## Sheet: I
Comparing Protein Overlap - Decreasing Protein in YPX aerobic, S7A Fig
Y127MR vs Y22-3MR; Y22-3MR isu1D vs Y22-3MR; Y22-3 MR hog1D isu1D vs Y22-3MR isu1D
GROUP I
YPL109C
YGR287C;Homologue_YGR292W
YBR139W
YHR092C
YOR348C
YIL053W
YHL032C
YPR049C
YLL032C
YMR247C
YKL201C
CpXylA

[truncated: 17 more sheets: J, K, L, M, N, O, P, Q, R, S, T, U, V, W, X, Y, Z]
