# Supplementary material for: Directed Evolution Reveals Unexpected Epistatic Interactions That Alter Metabolic Regulation and Enable Anaerobic Xylose Use by Saccharomyces cerevisiae
Source: PLoS Genet. 2016 Oct 14;12(10):e1006372. doi: 10.1371/journal.pgen.1006372 (PMC5065143; doi:10.1371/journal.pgen.1006372)
Supplement: S4 Appendix — (XLSX) [file pgen.1006372.s015.xlsx]

## Sheet: Y127MRvsY22-3MR
S4 Appendix. EdgeR Log2-fold changes and FDRs for pair-wise protein abundance comparisons between yeast strains grown in YPX aerobic.
Protein	log2 FC (Y127MR/Y22-3MR)	FDR (Y127MR vs. Y22-3MR)
YMR107W	-9.87211	0.0013486
YDL223C;REV__YIL016W	-9.07201	9.54619e-05
YHR096C	-9.04155	1.26027e-23
YGR088W	-7.75189	2.79911e-44
YER024W	-7.18096	3.03853e-32
YFL014W	-7.04239	0.000351179
YPR001W	-7.02357	1.77932e-20
YPR006C	-6.98654	1.50315e-37
YNL117W	-6.59029	0.00072659
YAL054C	-6.56883	6.16937e-08
YOL126C	-6.41091	5.99642e-25
YOR100C	-6.29074	7.51766e-12
YLR134W	-6.22467	0.000255809
YGR043C	-6.17248	8.42094e-26
YLR377C	-6.16316	1.59057e-08
YMR169C	-5.87454	2.10366e-31
YKL096W	-5.8548	3.17529e-12
YCR005C	-5.70401	1.49882e-16
YER065C	-5.70301	0.00254057
YGR256W	-5.506	1.29968e-12
YDR262W	-5.49614	1.26027e-23
YOR388C	-5.43793	0.011794
YIL057C	-4.80137	0.0125134
YDR256C	-4.78559	0.00959992
YMR303C	-4.48447	0.000143902
YPL147W	-4.23677	2.09153e-13
YLR284C	-4.21305	3.32341e-20
YGR243W	-4.05414	0.00140323
YDL204W	-3.9235	0.0295285
YKR097W	-3.78257	0.0334456
YPL222W	-3.74558	3.15523e-22
YNR002C	-3.32821	8.5808e-07
YGR127W	-3.28979	1.24262e-18
YDR533C	-3.27633	2.49383e-18
YNL014W	-3.22762	9.40382e-20
YPR026W	-3.21006	7.26959e-16
YDR070C	-3.16291	2.82045e-16
YIL055C	-3.11092	1.18529e-08
YCR076C	-3.03151	3.63673e-20
YMR174C	-2.95982	3.40291e-15
YAL062W	-2.93557	5.76006e-07
YOL151W	-2.8194	8.3293e-19
YNL202W	-2.80016	5.77691e-19
YLR080W	-2.74679	1.56506e-08
YBR280C	-2.5717	6.27659e-16
GTK30J00270	-2.40836	1.29968e-12
YGR248W	-2.36277	5.39079e-15
YFL007W	-2.31765	0.000136518
YPR127W	-2.25502	1.45102e-15
YDR006C	-2.20618	0.000194044
YKL023C-A	-2.17413	0.00432093
YML004C	-2.17111	3.02759e-23
YCL064C	-2.16911	0.00585815
YOR040W	-2.15535	1.38306e-11
YJR008W	-2.1413	1.13215e-14
YOR173W	-2.14	6.01097e-21
YMR170C	-2.13355	1.12699e-12
YJR096W	-2.13246	8.81992e-16
YLR079W	-2.12578	4.72293e-08
kanR	-2.08732	0.0235815
YJR095W	-2.06638	2.73379e-14
YBR054W	-2.04591	8.38333e-09
YMR011W	-2.00894	0.000152106
YBR169C	-1.99553	4.63865e-19
YNL115C	-1.99456	1.40583e-14
YHR209W	-1.96973	1.46476e-07
YOR084W	-1.96509	1.13215e-14
YNR023W	-1.92546	0.00650378
YHR138C	-1.91755	5.91622e-05
YGL156W	-1.91025	8.457e-14
YLR348C	-1.87427	1.93353e-07
YPR149W	-1.86721	7.94849e-07
YPL113C	-1.80115	8.61615e-08
YMR114C	-1.76583	9.80064e-05
YIR038C	-1.76181	3.55429e-15
YMR250W	-1.74138	1.86361e-11
YOR374W	-1.71823	0.00051235
YHR132W-A	-1.66748	1.01649e-05
YDR055W	-1.61396	1.3954e-09
YDR481C	-1.59858	0.000204333
YML131W	-1.5873	6.17465e-08
YMR090W	-1.58475	1.12212e-13
YMR056C	-1.5429	2.30551e-05
YER054C	-1.48071	0.000666987
YNR034W	-1.47678	2.57926e-10
YMR140W	-1.44612	0.000164584
YEL020C	-1.42335	4.44148e-09
YDR452W	-1.41762	1.55991e-05
YJR019C	-1.41574	4.86747e-09
YBR212W	-1.40024	0.0145921
YDR368W	-1.37597	9.05302e-11
YPL079W	-1.36827	4.8206e-08
YHR030C	-1.35441	1.04714e-10
YBR230C	-1.35307	0.000159102
YDL110C	-1.35179	3.13606e-09
YGL157W	-1.34477	2.4708e-06
YJR010W	-1.33559	3.32759e-06
YNL077W	-1.3254	0.00121004
YKR049C	-1.30872	4.22518e-06
YOR054C	-1.30019	0.00052908
YMR041C	-1.27935	0.0185424
YCR073W-A	-1.27284	2.95934e-07
YNL200C	-1.27	7.65744e-10
YLR300W	-1.26233	1.16572e-07
YMR240C	-1.25913	0.00120761
YOR113W	-1.22989	0.000785997
YNL108C	-1.22071	0.000207131
YFL024C	-1.21587	0.000785997
YGL080W	-1.205	0.00156656
YCL039W	-1.19597	0.000376041
YBR046C	-1.19334	3.60312e-07
YGL037C	-1.18964	2.78304e-10
YCL012C	-1.18392	4.37096e-05
YER042W	-1.17711	4.79104e-06
YER144C	-1.17311	0.00197209
YLR310C	-1.1657	0.00143637
YDR171W	-1.1574	8.2517e-08
YOL147C	-1.15397	1.29219e-05
YLR270W	-1.15282	7.9176e-09
YBR016W	-1.15227	0.000463953
YPL186C	-1.15054	0.000319065
YMR110C	-1.13017	4.4192e-07
YPL123C	-1.11288	0.0240399
YKR029C	-1.10555	0.0207593
YLR178C	-1.09748	5.41299e-05
YMR147W	-1.09472	0.0014072
YLL023C	-1.08893	1.34082e-05
YLR219W	-1.08506	2.26253e-05
YHR106W	-1.07188	0.000148053
YDR272W	-1.06335	6.51049e-07
YGL062W	-1.05702	3.18057e-05
YBR222C	-1.04786	1.99105e-06
YLR149C	-1.04311	0.021143
YKL146W	-1.01935	0.00816096
YMR304W	-1.01871	4.55112e-05
YGR008C	-1.01683	0.000290204
YOR289W	-1.00909	0.000319065
YLR250W	-1.00704	0.000501722
YGL009C	-1.00466	6.24166e-06
YKL001C	-1.0001	0.02609
YHL021C	-0.998117	7.24724e-07
YFL023W	-0.994265	0.00205313
YGR169C-A	-0.99171	0.0198159
YIL097W	-0.963983	0.00286839
YBR058C	-0.952082	1.71774e-05
YML070W	-0.950598	5.03999e-06
YCR051W	-0.948275	0.000225547
YKL151C	-0.945982	6.99486e-05
YMR196W	-0.936526	0.00205865
YCL033C	-0.923386	0.00841826
YGR283C	-0.920737	0.0287622
YEL044W	-0.920246	0.00311689
YCL029C	-0.918411	0.00841826
YKR066C	-0.918089	4.38238e-05
YBR006W	-0.916579	0.000145113
YOL032W	-0.905109	0.000708627
YMR246W	-0.903289	2.26253e-05
YKL191W	-0.897619	0.00636343
YDR490C	-0.882745	0.021551
YEL039C	-0.879377	0.0294054
YBR155W	-0.877082	0.00793376
YKR076W	-0.875417	0.000501722
YJR099W	-0.873436	0.00450829
YDL072C	-0.86889	0.000246554
YPL110C	-0.868853	0.0126606
YPL247C	-0.86091	0.0295285
YER004W	-0.859056	0.000112006
YDL001W	-0.858488	0.0401284
YLR324W	-0.841259	0.000999638
YLL015W	-0.840101	0.00401962
YDR328C	-0.837153	0.000194044
YBR089C-A	-0.831657	0.00321437
YBR286W	-0.825392	0.0160555
YDR202C	-0.819498	0.0427308
YIL017C	-0.815349	0.00883848
YJL155C	-0.809672	0.000717408
YLR231C	-0.793501	0.0125791
YCL028W	-0.79297	0.0056138
YJL146W	-0.786455	0.0286183
YER174C	-0.786008	0.00318321
YER111C	-0.782412	0.0169026
YIL007C	-0.774327	0.0180873
YIL033C	-0.758735	0.000587
YBR214W	-0.755746	0.00110887
YMR124W	-0.7549	0.0016266
YML007W	-0.750524	0.0399964
YLR258W	-0.748283	0.00249754
YDR001C	-0.74636	0.00118388
YER030W	-0.74613	0.0213723
YOL111C	-0.735809	0.00135784
YGL059W	-0.735793	0.0434382
YBL057C	-0.734107	0.0147697
YIL063C	-0.731024	0.02609
YNL173C	-0.728408	0.00124032
YCR003W	-0.727893	0.0143554
YIR036C	-0.726873	0.00117015
GTK30J00160	-0.719559	0.000784984
YCR067C	-0.712988	0.0204012
YHR089C	-0.702649	0.00433873
YPR063C	-0.701687	0.0295285
YCR035C	-0.70106	0.0374556
YIR037W	-0.700179	0.000584635
YML074C	-0.699322	0.00210145
YPL203W	-0.698435	0.00488811
YBL058W	-0.696287	0.00190077
YDL235C	-0.68816	0.0371762
YBR108W	-0.684042	0.02609
YJL141C	-0.682621	0.0113379
YML036W	-0.680184	0.0274308
YKL040C	-0.672844	0.0385639
YPL240C	-0.672361	0.0103243
YCL034W	-0.672032	0.00829104
YOR042W	-0.665689	0.0016266
YBR001C	-0.662476	0.0128323
YOL100W	-0.65762	0.0076096
YCR036W	-0.653062	0.0387133
YOR095C	-0.650483	0.00442142
YFL044C	-0.643734	0.0143214
YLR345W;Homologue_YLR345W	-0.641343	0.006491
YFR017C	-0.640502	0.0106287
YIL087C	-0.63648	0.0141161
YGR072W	-0.630652	0.0394253
YDL007W	-0.628644	0.00504306
YMR276W	-0.628573	0.0229997
YBR056W	-0.62712	0.0216823
YDR162C	-0.625161	0.0428848
YNL157W	-0.620655	0.0148147
YJR137C	-0.609068	0.0157081
YCR030C	-0.604341	0.00476741
YDR358W	-0.596457	0.0178198
YGR048W	-0.595656	0.0148147
YIL107C	-0.57447	0.0186278
YOR117W	-0.569374	0.00522454
YLR337C	-0.563999	0.0488068
YKL145W	-0.563207	0.0108549
YOR184W	-0.558782	0.00485074
YGL227W	-0.558531	0.0252446
YBL105C	-0.557773	0.0401339
YOR182C	-0.557485	0.0280053
YCR090C	-0.556604	0.0419902
YEL058W	-0.544075	0.0208982
YGL190C	-0.520307	0.0274582
YDR028C	-0.518569	0.042609
YPR172W	-0.500609	0.0388756
YCL057W	-0.491837	0.0248307
YOR086C	-0.488586	0.033835
YER048C	-0.479833	0.0436536
YDR293C	-0.477963	0.0269535
CpXylA	0.0710648	0
YNL247W	0.427843	0.0478461
YJR070C	0.430803	0.0407203
YOR206W	0.43285	0.0478461
YDR381W	0.456508	0.0377003
YDL040C	0.462679	0.0470803
YOL049W	0.463435	0.0408028
YLL036C	0.469554	0.0496933
YPL210C	0.470195	0.0393522
YBR052C	0.472265	0.0434382
YGR210C	0.480307	0.0492407
YBL032W	0.481351	0.0478436
YJR080C	0.483122	0.0466879
YOR074C	0.487547	0.0393522
YDL140C	0.488128	0.0207593
YDR231C	0.496388	0.0417749
YJR069C	0.499453	0.0229997
YLR262C	0.500634	0.0393271
YJL082W	0.509862	0.042788
YPR019W	0.511285	0.0282947
YOL012C	0.512982	0.0336851
YHR052W	0.518363	0.0397727
YDR101C	0.519024	0.0253531
YDR399W	0.519489	0.0252446
YMR039C	0.525683	0.040251
YOR112W	0.526217	0.0288206
YPL031C	0.529873	0.0304204
YLR002C	0.533575	0.0318018
YGR165W	0.537549	0.0185424
YKL112W	0.538138	0.0338283
YML048W	0.538457	0.0185255
YNL307C	0.538941	0.0128742
YKR002W	0.54006	0.0254743
YDL130W	0.542264	0.0366857
YBR247C	0.54304	0.0238228
YBR034C	0.544706	0.0148147
YPL145C	0.550237	0.0216645
YDL141W	0.553492	0.0130884
YHR043C;YHR044C	0.555071	0.0138849
YNL004W	0.557989	0.0216368
YBR037C	0.560847	0.0322546
YDR494W	0.561324	0.0185255
YBR283C	0.56213	0.0385091
YGL022W	0.563687	0.0128742
YIL157C	0.563961	0.033835
YLR229C	0.567992	0.020312
YML030W	0.56856	0.0466676
YDR061W	0.568585	0.0204832
YMR089C	0.569367	0.0106029
YLR129W;REV__YKR084C	0.571444	0.0330638
YPL118W	0.572369	0.0202084
YEL055C	0.577373	0.0334456
YGR279C	0.578624	0.00915183
YNL229C	0.578676	0.0243697
YPR047W	0.579424	0.0374511
YDR296W	0.581114	0.0185255
YIR004W	0.584274	0.0144374
YBL037W	0.586396	0.0180285
YNL131W	0.587055	0.00328743
YPL032C	0.587292	0.0262941
YLR248W	0.587428	0.0107692
YOR354C	0.590881	0.0117674
YOR165W	0.593081	0.00522653
YPL128C	0.593144	0.0242439
YMR134W	0.597093	0.0241133
YHR147C	0.597303	0.0125488
YDL178W	0.599298	0.00403182
YGL078C;REV__YHR056C	0.599622	0.0107692
YGL160W	0.60057	0.0252717
YBR159W	0.601145	0.0182009
YPL217C	0.601938	0.0193776
YIL076W	0.605956	0.0372727
YER087W	0.606317	0.0182372
YDR335W	0.610162	0.0339552
YPR187W	0.611191	0.022113
YLR071C	0.616604	0.0394606
YKL167C	0.618222	0.021143
YHR039C	0.618604	0.0130884
YDR175C	0.619497	0.00998008
YER126C	0.622594	0.0121437
YNL147W	0.623912	0.0322505
YNL005C	0.626797	0.00400693
YNR017W	0.628238	0.00719854
YDL104C	0.630008	0.0473098
YPR154W	0.631442	0.0188406
YJL002C	0.632288	0.00962978
YBR022W	0.633985	0.0417223
YNL161W	0.634229	0.0206262
YBR109C	0.635586	0.0069301
YGR235C	0.636474	0.00267258
YEL052W	0.637083	0.00390319
YMR157C	0.639029	0.0120062
YBL023C	0.64185	0.0139705
YKR081C	0.644514	0.042788
YBR171W	0.645515	0.011084
YER031C	0.647143	0.0047889
YLR220W	0.647294	0.0394253
YIL106W	0.647562	0.0138295
YLR163C	0.650605	0.0044555
YKL029C	0.651116	0.00136826
YHR098C	0.654331	0.00437282
YDR476C	0.654864	0.0188406
YMR216C	0.655046	0.0448075
YHR005C	0.655072	0.00286839
YML106W;YMR271C	0.655199	0.0044555
YJL186W	0.656374	0.0220705
YBR164C	0.656563	0.00517131
YGL107C	0.658025	0.0150386
YKL212W	0.658402	0.0018763
YMR296C	0.660808	0.00462611
YJL208C	0.661675	0.00185526
YHR112C	0.661953	0.0213723
YOR099W	0.662603	0.00457167
YBR252W	0.662625	0.0056627
YBL090W	0.665745	0.0262941
YEL040W	0.667163	0.0419902
YBR154C	0.667256	0.0112551
YLR447C	0.667606	0.00130298
YPR165W	0.668016	0.00143619
YIR022W	0.668113	0.0117816
YOR211C	0.668497	0.00168036
YOR158W	0.669377	0.00575955
YER164W	0.670358	0.00818084
YOR131C	0.676197	0.00183871
YFR011C	0.677659	0.00581354
YHR121W	0.680574	0.0044555
YCL037C	0.680824	0.0338563
YHR042W	0.680873	0.00060589
YDR316W	0.683191	0.00747907
YBR122C	0.687477	0.00547496
YMR071C	0.690103	0.0140884
YHR068W	0.690798	0.0069301
YGL129C	0.691714	0.00096652
YER148W	0.692088	0.00585437
YOL052C	0.693313	0.0178392
YIL098C	0.693556	0.0076096
YGL115W	0.696438	0.00385388
YCR046C	0.6967	0.00231717
YGR017W	0.697097	0.0189354
YJL033W	0.697527	0.0201373
YIL128W	0.698984	0.0056627
YMR044W	0.70049	0.0438985
YJR143C	0.700659	0.0016266
YOR108W	0.700687	0.0167105
YOR357C	0.702881	0.00691852
YGL201C	0.706203	0.00122134
YIL093C	0.708286	0.00409911
YDR044W	0.708769	0.0036228
YAL026C	0.711027	0.0285919
YPL140C	0.711292	0.0464736
YPL050C	0.712663	0.00140341
YBR251W	0.71517	0.00343163
YER166W	0.71916	0.00818084
GTK30I00160	0.719743	0.0392052
YKR035W-A	0.721873	0.00409733
YNL111C	0.722544	0.00311689
YLR177W	0.722786	0.0178198
YBR172C	0.725878	0.00402751
YKL032C	0.728433	0.0115241
YLR077W	0.728953	0.0100593
YBR185C	0.72938	0.00966705
YOL115W;YNL299W	0.730519	0.0185497
YPL232W	0.731276	0.00931284
YNL085W	0.731602	0.0031396
YIL062C	0.732901	0.0114115
YBR003W	0.733102	0.00818084
YNR036C	0.734463	0.00568035
YHR039C-A	0.739611	0.000573487
YKL165C	0.740648	0.00257946
YML025C	0.741264	0.000690936
YMR286W	0.742205	0.00222192
YBR106W	0.745523	0.00233739
YGR076C	0.746525	0.00148487
YDR322W	0.74866	0.00119041
YNL154C	0.751086	0.000874023
YIR012W	0.754236	0.0288206
YLR439W	0.754545	0.000760926
YJL055W	0.754768	0.00194187
YKL039W	0.754953	0.000633509
YML050W	0.756355	0.0185002
YIR030C	0.756849	0.0330638
YPL063W	0.757522	0.000220066
YPL117C	0.757813	0.00184923
YNL001W	0.758009	0.00965767
YKL087C	0.758935	0.00216894
YMR158W	0.759355	0.00160316
YLR357W	0.759526	0.0202084
YLL052C;YPR192W	0.759674	0.00147007
YLR312W-A	0.761211	0.00132199
YBR103W	0.761896	0.03962
YHR163W	0.763264	0.000161513
YPR004C	0.763427	0.000437809
GTK30D04150	0.763502	0.0185497
YFL041W	0.764495	0.0202084
YOR360C	0.767831	0.0207593
YLR059C	0.769915	0.00137121
YOR043W	0.770774	0.00156656
YFL017C	0.771128	0.00448276
YOR115C	0.77251	0.0193004
YPL266W	0.779631	0.0033259
YJR075W	0.782968	0.00605646
YDR337W	0.784542	0.000313655
YDL064W	0.785788	0.00163744
YPL097W	0.789188	0.000512969
YKL194C	0.789355	0.000962542
YMR076C	0.789629	0.0131598
YJR076C	0.789953	0.000124823
YCL057C-A	0.790078	0.0374556
YJL178C	0.792807	0.00409911
YLR378C	0.793338	0.00311232
YBL080C	0.794038	0.00817496
YOR236W	0.794765	0.0144268
YMR043W	0.794942	0.0106287
YJL125C	0.795479	0.0139822
YPR125W	0.798896	0.000527764
YER009W	0.805907	0.0202327
YHR018C	0.806077	0.000272153
YPL059W	0.808873	0.000214184
YKR042W	0.811283	0.0081487
YLR393W	0.811565	0.00871858
YNR040W	0.812773	0.00079661
YMR290C	0.813649	0.000113347
YGL012W	0.816009	0.000544966
YLR321C	0.818648	0.000982943
YNL081C	0.818749	0.00290774
YKL154W	0.820548	0.00959678
YLR372W	0.821424	0.00457167
YBR192W	0.822296	0.00215533
YOR266W	0.823629	0.00168036
YDL198C	0.82499	5.96908e-05
YMR024W	0.82668	0.000131408
YHR024C	0.827037	0.00026608
YOR145C	0.827451	0.0139682
YPR111W	0.82833	0.0263994
YNL252C	0.828339	0.000159199
YER073W	0.828742	0.0182372
YOL023W	0.828972	0.0126059
YBR015C	0.829237	3.98184e-05
YDL224C	0.833142	0.00515435
YPR139C	0.835818	0.0307439
YLR203C	0.837794	6.09821e-05
YGR171C	0.838551	0.00581354
YDL142C	0.839354	0.0243697
YKR006C	0.840813	0.000248502
YDR062W	0.841342	0.0044555
YJL096W	0.842749	0.00280161
YDR465C	0.844271	0.0248069
YLR139C	0.845216	0.000154859
YGR150C	0.846181	0.0117816
YER083C	0.846809	0.00152609
YKL141W	0.852036	0.00215533
YOL005C	0.853933	0.00152274
YDR264C	0.855876	0.00490013
YOL070C	0.856649	0.0271597
YIL074C	0.857237	0.00103924
YNL044W	0.857648	0.000734514
YNL251C	0.857734	0.000164584
YBR146W	0.86004	0.000354804
YAL007C	0.860319	0.00989267
YDL202W	0.860709	0.000309413
YMR282C	0.861623	0.00817496
YGL050W	0.863191	0.0183895
YNL185C	0.863582	0.000226167
YGL040C	0.864067	1.96802e-05
YNL231C	0.866767	0.000216913
YPL103C	0.868706	0.00162259
YHL004W	0.870921	0.000129894
YOR022C	0.871637	0.0283307
YOR057W	0.874851	0.00907076
YDL219W	0.877493	0.00429451
YDL181W	0.882719	0.000921625
YFL042C	0.883253	0.0322505
YCR026C	0.884303	0.00685933
YOR327C	0.888722	0.00347074
YNL137C	0.89119	2.18979e-05
YBR041W	0.892114	0.000784984
YBR207W	0.89218	0.0076096
YDR228C	0.894539	0.00719248
YNL073W	0.894906	0.000541396
YKL138C	0.895376	0.000523609
YOL006C	0.89558	0.000618563
YAL019W	0.895778	0.0488068
YOR036W	0.898498	0.00694194
YHR199C	0.900249	8.42143e-05
YDL095W	0.902884	3.36593e-05
YGR147C	0.903662	0.0010322
YIL118W	0.905757	5.0559e-05
YDR033W	0.907363	0.000108814
YAL025C	0.911086	0.00135914
YBR205W	0.917779	4.23909e-05
YDR483W	0.918288	0.000513053
YMR002W	0.919313	0.0047889
YDR397C	0.921691	0.00168036
YKL119C	0.927079	0.0332193
YPL040C	0.927707	0.000652318
YEL036C	0.927822	0.00147007
YMR202W	0.928258	0.00011213
YGR028W	0.929081	0.000214184
YNL087W	0.932159	4.09866e-05
YKL206C	0.932585	0.00327781
YJR122W	0.936344	0.00156656
YOR224C	0.937904	0.000113347
YPR113W	0.938489	0.000962542
YKL128C	0.9396	0.00051235
YMR312W	0.946322	0.0287787
YPR020W	0.948177	0.000314273
YDR266C	0.949585	0.00231717
YER154W	0.949627	0.00614361
YER002W	0.95291	0.00249754
YML059C	0.954339	0.000217996
YKL144C	0.955579	0.00565911
YNL244C	0.961737	3.56609e-05
YLL013C	0.962056	6.54146e-05
YML097C	0.963267	0.0260119
YJR005W	0.964965	0.00156656
YPR024W	0.967233	1.77831e-06
YJL063C	0.970406	4.37221e-05
YNL153C	0.972126	0.00026608
YDR120C	0.974326	3.04446e-06
YLL043W	0.975616	0.00685875
YOL008W	0.981838	0.00669291
YLR425W	0.983111	0.000734514
YLR179C	0.984993	1.53472e-05
YOL071W	0.986698	0.00122134
YKL201C	0.988055	0.000319065
YDR041W	0.991291	5.90944e-05
YDR510W	0.991387	0.000101133
YNL177C	0.992096	1.38201e-05
YJL088W	0.993718	4.27965e-06
YHR154W	0.994426	0.00409911
YPL224C	0.995168	0.00140341
YDR251W	0.995856	0.00200409
YNL002C	1.00089	1.56524e-06
YDL044C	1.00203	0.00412413
YKR065C	1.00255	5.47134e-05
YBR029C	1.00361	9.80064e-05
YMR188C	1.00442	7.99601e-06
YHR137W	1.00508	0.000629284
YHR143W-A	1.00534	0.000527988
YBR199W	1.00971	0.00543846
YER159C	1.01285	2.97189e-05
YMR054W	1.01395	5.02152e-05
YER168C	1.01401	0.000487668
YBR291C	1.01586	1.06017e-05
YJR113C	1.016	3.08675e-06
YDR248C	1.01787	0.0372136
Q0140	1.02553	3.81429e-06
YLR435W	1.02668	0.00234832
YOR244W	1.02904	0.0401339
YDR508C	1.03016	0.000274571
YDR424C	1.03074	0.012083
YDR079W	1.03078	0.000784984
YJL102W	1.04208	0.00329856
YNL100W	1.04291	3.56285e-06
YMR228W	1.04305	0.000129721
YLR454W	1.04448	0.00233739
YOR288C	1.04754	0.0208982
YOR016C	1.04977	0.00235861
YGR111W	1.05009	4.23909e-05
YDR093W	1.05493	0.0294054
YGR284C	1.0603	1.06538e-05
YLR100W	1.06643	1.38201e-05
YGL226W	1.06731	0.0034769
YMR267W	1.0751	0.000351179
YJR100C	1.08125	0.00103924
YDR237W	1.08169	5.91547e-06
YDR375C	1.0822	0.000470483
YGL191W	1.08368	0.000601804
YPR182W	1.08812	0.0216823
YGL241W	1.0917	0.0193776
YNL323W	1.09422	0.000100322
YOR370C	1.09805	1.46665e-06
YLR380W	1.09989	3.15803e-08
YPR188C	1.10183	0.00530137
YOR222W	1.10787	3.77683e-06
YDL031W	1.10907	0.000101133
YGL171W	1.11099	0.000700612
YHR086W	1.11568	0.000228593
YOL124C	1.11575	0.0016266
YJR073C	1.11655	0.0224415
YDL102W	1.11781	0.00211199
YDL052C	1.11816	4.72293e-08
YDR268W	1.12603	0.000119542
YLR382C	1.13037	1.97701e-06
YBL016W	1.13137	2.66226e-05
YBL059C-A	1.13419	1.12073e-05
YDR286C	1.13545	0.00620873
YNL052W	1.13628	4.00971e-05
YPR166C	1.1368	0.000808036
YDR297W	1.13907	0.000265846
YAL023C	1.14027	4.72266e-07
YBR097W	1.14089	0.0100852
YOL053W	1.1434	0.00217038
YNL169C	1.14563	4.76878e-05
YER058W	1.14745	0.0029787
YDR194C	1.15397	1.61069e-06
YKL137W	1.15405	0.000209527
YDR204W	1.16563	0.00975658
YLL011W	1.16931	0.0182294
YJR031C	1.1731	0.00996706
YKL022C	1.17378	0.00576281
YBR044C	1.17744	2.98751e-08
YER141W	1.17992	4.07214e-07
YJR086W	1.18078	0.000246785
YNL067W	1.18214	4.03179e-05
YPL093W	1.18254	6.12111e-07
YMR241W	1.18276	1.86292e-09
YPL082C	1.18485	0.00523068
YDR347W	1.19222	1.9024e-08
YGL054C	1.19912	0.000322206
YJL180C	1.20203	3.0457e-06
YGR271C-A	1.20352	0.00267258
YBR082C	1.2143	2.99344e-06
YLR017W	1.21876	1.27357e-07
YHR063C	1.21955	2.70539e-07
YFL036W	1.22027	0.0375595
YMR098C	1.22086	6.62504e-05
YPL206C	1.22242	0.00159382
YMR038C	1.2289	1.80053e-08
YOR320C	1.2307	5.90944e-05
YGL101W	1.23255	1.27357e-07
YOR196C	1.23711	5.31861e-07
YBR262C	1.23958	1.31572e-06
YFL021W	1.24174	0.00626784
YAR073W|YAR075W	1.24811	1.99105e-06
YJR042W	1.24938	0.000141172
YGR058W	1.25048	0.00674995
YGR202C	1.25131	0.000129258
YNL003C	1.25215	0.00122134
YPR011C	1.25238	0.00881367
YOR171C	1.25471	3.1332e-06
YNL306W	1.25643	6.45758e-07
YML009C	1.25963	2.38157e-05
YJL122W	1.2759	9.06501e-06
YPR067W	1.27635	7.88196e-05
YER044C	1.27807	5.48502e-07
YKL058W	1.28824	5.88057e-08
YDR322C-A	1.29015	0.000164584
YHR103W	1.29485	3.34725e-06
YHR088W	1.29528	1.69921e-05
YJL183W	1.29595	1.88298e-10
YIL009W	1.30316	2.95578e-08
YBR233W	1.30414	0.000129721
YEL042W	1.31108	7.08437e-11
YDR130C	1.31487	8.7701e-06
YDR245W	1.31597	1.44667e-05
YDR040C	1.31702	0.0193035
YOR373W	1.31702	0.000815499
YJL046W	1.31777	0.000180418
YPL132W	1.31987	1.99845e-08
YFR041C	1.32296	5.36282e-05
YCL025C	1.33528	0.00169137
YGR245C	1.34669	0.00224199
YPR037C	1.34723	0.000225547
YBR145W	1.35652	7.48854e-06
YBR023C	1.35985	2.65376e-05
YBL033C	1.36771	2.0762e-09
YDR511W	1.38403	2.78304e-10
YNR053C	1.38494	1.86292e-09
YHR084W	1.38543	0.00011414
YNR037C	1.39269	6.7507e-09
YER026C	1.39378	0.000316654
YJR101W	1.3972	4.41921e-10
YPR073C	1.3973	5.04711e-08
YPR030W	1.41614	0.000236409
YGR257C	1.42399	0.000428229
YHR001W-A	1.42415	1.0868e-05
YBL026W	1.42436	2.0287e-07
YJR085C	1.42607	2.26253e-05
YOR037W	1.42671	0.000347418
YJL166W	1.43654	6.43429e-10
YCR043C	1.44128	5.27356e-06
YDL021W	1.44682	7.08437e-11
YFR015C	1.46416	1.05658e-12
YKL155C	1.4647	2.00391e-05
YLR253W	1.47186	0.000159199
YLR289W	1.48529	0.000831121
YML110C	1.49229	1.62862e-12
GTK30O04200;GTK30B01620	1.49857	6.62504e-05
YML091C	1.50196	0.01561
YDR377W	1.51176	3.41484e-13
YLR455W	1.51526	0.0123131
YGR021W	1.51841	1.53929e-05
YIL015W	1.5362	9.32258e-07
YLR043C	1.55303	1.11495e-05
YBL085W	1.55807	5.86543e-05
YHR165C	1.56765	0.000851862
YOR125C	1.58048	0.000319065
YCR102C	1.58571	0.000214998
YGR229C	1.60595	2.41647e-09
YKL003C	1.64524	0.000562371
YLR068W;REV__YLR291C	1.67253	6.1174e-06
YPR035W	1.67301	3.25496e-13
YGL068W	1.68638	4.58264e-13
YGL057C	1.72876	2.1594e-08
YLR274W	1.73157	1.43268e-06
YAL039C	1.74104	1.39334e-12
YNL259C	1.76062	1.69816e-07
YPR010C-A	1.78243	1.22908e-14
YBR028C	1.79335	0.000851862
YKL192C	1.81109	1.26767e-08
YDL236W	1.81943	3.55429e-15
YGR020C	1.82199	4.06581e-13
YKL164C;YJL160C	1.82804	0.00219911
YLL018C-A	1.83167	1.29219e-05
YHR005C-A	1.84417	3.94554e-07
YHR167W	1.87103	0.000226029
YOL077W-A	1.87387	1.1283e-13
YPL207W	1.89054	1.10345e-05
YKL197C	1.90235	0.000874023
YGR032W	1.91016	1.41608e-12
YLR395C	1.91239	1.65034e-10
YMR256C	1.91514	0.00060008
YOR316C	2.02983	2.14275e-12
YER048W-A	2.03206	2.25605e-13
YGR026W	2.04308	9.06501e-06
YOR274W	2.04682	0.000760926
YOR210W	2.04778	0.000891364
YIL079C	2.04825	8.19813e-06
YBR177C	2.06273	7.8859e-24
YMR285C	2.07275	1.11036e-06
YMR291W	2.09221	1.17306e-11
YDL130W-A	2.11287	5.82395e-07
YMR015C	2.16979	3.6037e-10
YGR255C	2.20217	1.05418e-07
YKL046C	2.2061	4.468e-13
R0040C	2.21617	2.02536e-07
YEL020W-A	2.21639	5.359e-13
YCR071C	2.22518	2.36386e-13
YDR216W	2.22714	4.71806e-10
YPR124W	2.29945	1.96591e-05
YNR034W-A	2.30856	0.00148487
YDR011W	2.31414	1.91443e-12
YBR202W	2.32328	2.3844e-09
YLR038C	2.37797	4.44956e-12
YLR201C	2.4132	1.06837e-20
YGL055W	2.4196	2.94027e-22
YGR292W;YBR299W	2.48853	1.92508e-14
YPL057C	2.52725	2.31108e-11
YLR056W	2.54199	8.67869e-26
YJR135W-A	2.55256	5.8847e-09
YGL039W	2.63512	3.55429e-15
YGR157W;REV__YGL134W	2.67991	5.48502e-07
YGL236C	2.69165	3.20476e-16
YPL171C	2.78086	5.48238e-06
YLR295C	2.8137	8.67869e-26
YGR037C	2.85228	2.43097e-18
YLR342W	2.91984	1.53781e-26
YML129C	2.92024	1.56524e-06
YGR060W	2.93455	1.56524e-06
YBR085C-A	2.93472	1.65333e-07
YLR411W	2.9474	3.55724e-07
YER001W	2.95046	2.14275e-12
YBR269C	3.04777	1.43051e-08
YDR507C	3.06986	1.01703e-15
YER070W	3.07848	5.96206e-36
YOR283W	3.08546	3.81006e-26
R0020C	3.12478	7.58219e-17
YGR181W	3.28019	6.38337e-17
YER081W	3.28293	7.83401e-10
GTK30N00600	3.38286	3.46888e-10
YDL067C	3.41608	1.87565e-15
YPL271W	3.85325	1.26027e-23
GTK30G03460;GTK30X00120;GTK30D03460|GTK30D03470	3.89461	1.45923e-45
YBR265W	3.97769	1.08401e-22
YOR153W	4.19369	1.08406e-06
YBR208C	4.40864	7.74149e-23
YDR232W	4.43424	6.22593e-20
YKR052C	4.54603	1.00906e-23
YMR058W	4.58376	7.63759e-12
YOR375C	4.65053	0.011084
YML081C-A	4.65376	1.05086e-22
GTK30J01230;GTK30R00130;GTK30L03860;GTK30L03870	4.89632	7.74149e-23
YPL058C	5.23148	0.000238117
YEL046C	5.41349	6.0075e-49
YMR272C	5.60039	3.55429e-15

## Sheet: Y22-3MR isu1vsY22-3
S4 Appendix. EdgeR Log2-fold changes and FDRs for pair-wise protein abundance comparisons between yeast strains grown in YPX aerobic.
Protein	log2 FC (Y22-3 isu1D/Y22-3MR)	FDR (Y22-3MR isu1D vs. Y22-3MR)
YDL223C;REV__YIL016W	-4.60997	0.0391001
YLR134W	-3.76247	0.0317063
YOL126C	-3.53509	5.37562e-10
YLR080W	-3.46073	4.38713e-12
YHR096C	-3.2927	1.74555e-05
YLR284C	-3.10648	5.0587e-12
YPL135W;YOR226C	-3.08588	9.89678e-07
YNL014W	-3.0676	1.26242e-17
YER024W	-2.93576	3.96774e-08
YDR262W	-2.93469	1.29703e-08
YDR533C	-2.77865	1.77004e-13
YOR100C	-2.7579	0.00208828
YCR076C	-2.46668	9.95927e-14
YNR023W	-2.45999	0.000798737
YPL147W	-2.36929	4.4352e-05
YKL023C-A	-2.26	0.00542951
YFL007W	-2.2159	0.000497458
YGR127W	-2.06076	4.30437e-08
YMR169C	-2.05426	1.21989e-05
YGR043C	-1.99359	0.000316355
YLR079W	-1.94321	1.24803e-06
YGR088W	-1.91336	8.05893e-05
YBR280C	-1.90854	3.72378e-09
YDR329C	-1.85385	0.000700071
YPR026W	-1.78105	1.36033e-05
YGR256W	-1.7755	0.0298734
YPL222W	-1.71161	1.23126e-05
YNL311C	-1.67828	0.000316499
YMR056C	-1.67612	6.81815e-06
YPL171C	-1.67151	0.0134058
YMR250W	-1.64811	5.22012e-10
YPL247C	-1.64526	1.31461e-05
YPR149W	-1.61494	4.27375e-05
YIL055C	-1.61392	0.00679903
YPR127W	-1.5691	7.0098e-08
YPL123C	-1.54279	0.00208828
YMR041C	-1.52562	0.0071765
YCR005C	-1.51508	0.0369083
YPR001W	-1.51374	0.0467888
YDR006C	-1.50316	0.0238631
YGR248W	-1.49567	2.07169e-06
YMR090W	-1.49168	6.90389e-12
YOR173W	-1.49057	1.55134e-10
YDR481C	-1.48412	0.00115824
YML004C	-1.47869	3.19863e-11
YNL115C	-1.44679	6.97363e-08
YCR102C	-1.44451	0.00153227
YOR040W	-1.43352	1.98462e-05
YCL012C	-1.40254	1.61933e-06
YKR094C;YIL148W;YLL039C	-1.38388	0.0164135
YJR008W	-1.38091	1.95856e-06
YNL200C	-1.34314	1.45925e-10
YPL186C	-1.29596	7.64436e-05
YEL020C	-1.28379	2.93402e-07
YIR038C	-1.27557	3.96774e-08
YBR212W	-1.25424	0.0491263
YNL077W	-1.25257	0.00441747
YCL039W	-1.24997	0.000349969
YHR138C	-1.2309	0.0233914
YBR169C	-1.22909	1.29838e-07
YEL039C	-1.22537	0.00273312
YOR289W	-1.21981	1.7009e-05
YDR452W	-1.20025	0.000590785
YCR073W-A	-1.19923	2.94907e-06
YJR096W	-1.19616	2.07578e-05
YMR174C	-1.19483	0.00403911
YGL059W	-1.19376	0.000792807
YFR043C	-1.18913	0.00755911
YGR169C-A	-1.17101	0.00833125
YGL156W	-1.1565	2.10306e-05
YDL091C	-1.15603	0.00458519
YBR016W	-1.15084	0.000870592
YPL015C	-1.13461	0.00832964
YHR132W-A	-1.11426	0.00795793
YLR219W	-1.1019	2.93144e-05
YMR153W	-1.09245	0.0013806
YMR231W	-1.09226	0.0239523
YKR076W	-1.08444	1.80701e-05
YHR106W	-1.06999	0.000279876
YDR171W	-1.05989	2.10219e-06
YNL202W	-1.01256	0.00401515
YPL113C	-1.01152	0.00771158
YOL151W	-1.00866	0.00474175
YMR170C	-1.00041	0.00303417
YPL152W	-1.00017	0.0257587
YBR286W	-0.994648	0.00525197
YER042W	-0.989479	0.000291628
YDR070C	-0.974655	0.0298734
YLR324W	-0.964977	0.000235628
YCR030C	-0.955922	4.50495e-06
YDR229W	-0.947847	0.0175576
YMR165C	-0.947149	0.0242429
YDL110C	-0.946198	0.00011375
YOR054C	-0.935941	0.028566
YIL097W	-0.931776	0.00742537
YNL223W	-0.922924	0.027388
YLR180W	-0.907828	0.000101243
YFL023W	-0.899068	0.0106499
YFL024C	-0.891838	0.030271
YLR178C	-0.891798	0.0025263
YBR222C	-0.889971	0.00013435
YJL141C	-0.88242	0.00129755
YMR140W	-0.880073	0.0493005
YJR095W	-0.878097	0.00458519
YLL015W	-0.864813	0.00542951
YBR046C	-0.862178	0.00070759
YCL029C	-0.862176	0.0246262
YPL240C	-0.846054	0.00158459
YER175C	-0.833194	0.0238631
YKL151C	-0.807594	0.00158459
YJL164C	-0.802495	0.0406105
YOR084W	-0.802467	0.00613905
YGL157W	-0.789916	0.016227
YCL052C	-0.785499	0.0213283
YBR056W	-0.781244	0.00565429
YBR108W	-0.771674	0.0181487
YNR034W	-0.770858	0.00371666
YNR013C	-0.76797	0.0120371
YLL023C	-0.761204	0.00633754
YFR017C	-0.760718	0.00344112
YPL111W	-0.759596	0.00184799
YDR328C	-0.758401	0.00156899
YCR067C	-0.753389	0.0232615
YIL033C	-0.752361	0.00124944
YCR036W	-0.747645	0.025567
YCL011C	-0.736676	0.00311391
YLR258W	-0.733653	0.0057987
YCR051W	-0.729939	0.0106499
YPL203W	-0.729539	0.00571031
YMR196W	-0.726956	0.0350768
YLR270W	-0.712107	0.00133961
YIL017C	-0.703393	0.0441728
YMR110C	-0.700642	0.00556217
YJL155C	-0.700094	0.00734348
YOR101W	-0.699983	0.0299189
YMR004W	-0.696019	0.038937
YOL153C	-0.686106	0.0128044
YDR001C	-0.682649	0.00613905
YBR058C	-0.677211	0.00610346
YEL011W	-0.672672	0.00933353
YGR008C	-0.658001	0.0442557
YCL057W	-0.653661	0.00333068
YMR086W	-0.643192	0.0111843
YCL018W	-0.630394	0.00754357
YLR345W;Homologue_YLR345W	-0.623573	0.014794
YBR214W	-0.617416	0.0169108
YCL034W	-0.61117	0.0301828
YNL157W	-0.607411	0.0296479
YGL190C	-0.594263	0.017355
YBL058W	-0.588792	0.0184947
YOL100W	-0.580634	0.0341681
YDR028C	-0.580191	0.0328569
YNL173C	-0.577006	0.0233914
YHR089C	-0.57164	0.0404542
YIR036C	-0.560272	0.0273796
YIR037W	-0.554525	0.0146867
YJL128C	-0.534286	0.0418656
YDR321W	-0.530478	0.0434964
YNL007C	-0.508047	0.0308279
YJL020C	-0.502976	0.0396908
YCR012W	-0.319875	0.00623163
YHR042W	0.488446	0.0317063
YPR165W	0.51055	0.031921
YNL131W	0.515562	0.0201141
YDL198C	0.516689	0.0305449
YMR024W	0.517208	0.0407877
YDL095W	0.517503	0.0445382
YDR494W	0.524936	0.0464818
YDR337W	0.525551	0.0370096
YJR076C	0.530819	0.0249508
YML106W;YMR271C	0.53085	0.0421827
YNL137C	0.531993	0.0301708
YDL205C	0.532112	0.047457
YDR322W	0.534328	0.0450396
YLR203C	0.536159	0.0269337
YBR252W	0.536261	0.0486371
YOR165W	0.541701	0.0209867
YOR211C	0.544702	0.0232615
YBR015C	0.548111	0.0175279
YGR076C	0.551193	0.0408466
YBR034C	0.557374	0.0213283
YMR286W	0.561951	0.0435441
YDR175C	0.563836	0.0341657
YGL040C	0.570791	0.0130918
YMR009W	0.571045	0.0370096
YMR039C	0.571266	0.0376587
YIL093C	0.571839	0.0407877
YAL023C	0.575045	0.032426
YPL013C	0.57615	0.0467888
YGL129C	0.577567	0.012778
YDR237W	0.579943	0.0408466
YNL087W	0.580954	0.0277237
YGR028W	0.583568	0.0467888
YMR290C	0.584601	0.0137036
YLR100W	0.584704	0.0448179
YBR109C	0.58638	0.0240993
YNL252C	0.588175	0.0181767
YMR054W	0.589991	0.0454307
YER148W	0.590994	0.0358066
YGL078C;REV__YHR056C	0.592123	0.0208739
YHR147C	0.593303	0.0230847
YOL030W	0.594374	0.0353772
YOR224C	0.596237	0.0341681
YBR146W	0.596798	0.030961
YPR004C	0.597296	0.0135966
YKR006C	0.602226	0.0213283
YOL006C	0.603874	0.0467888
YFR011C	0.605076	0.0268474
YBR106W	0.610432	0.0270674
YER087W	0.611113	0.0285851
YKR065C	0.619237	0.0318417
YLR262C	0.619252	0.0137216
YER083C	0.61945	0.0440004
YPR154W	0.623025	0.0335698
YDR347W	0.624903	0.0110416
YPL103C	0.626676	0.0487167
YGL106W	0.635148	0.0459144
YHR039C-A	0.640371	0.00623163
YOR271C	0.641872	0.0198067
YER044C	0.649543	0.031618
YNL323W	0.654053	0.047457
YLR248W	0.658203	0.00650146
YCR046C	0.658618	0.00771158
YGL012W	0.659677	0.0116494
YLR077W	0.660687	0.0353059
YGR235C	0.662118	0.00322255
YER126C	0.664598	0.0119884
YOL005C	0.668405	0.028566
YDR296W	0.669709	0.00944258
YML079W	0.67275	0.0169108
YPR024W	0.674957	0.00262611
YNL177C	0.67912	0.00792535
YDL130W	0.679193	0.0111115
YER057C	0.682431	0.00326663
YDL202W	0.68642	0.00922929
YML059C	0.686543	0.0189886
YJL063C	0.689547	0.0093951
YMR225C	0.693042	0.0475138
YMR158W	0.693133	0.00795793
YOR327C	0.697527	0.0440187
YLR179C	0.699277	0.00583978
YML094W	0.700396	0.033375
YNL244C	0.702313	0.00650146
YHR059W	0.702467	0.0259954
YBL026W	0.705766	0.0298734
YPL063W	0.705783	0.00121594
YKL167C	0.706587	0.0123505
YNL185C	0.709567	0.00571031
YBR145W	0.713159	0.0472451
YMR188C	0.720361	0.00381686
YLR061W	0.72137	0.0453809
YDL052C	0.724346	0.0013806
YDR041W	0.724946	0.00825551
YOR360C	0.726306	0.0475138
YDR483W	0.730705	0.0127853
YGR171C	0.731011	0.030961
YBR082C	0.731491	0.0138706
YPR125W	0.733283	0.00308438
YJR113C	0.733733	0.00221058
YBR291C	0.735761	0.00392084
YKL058W	0.73621	0.0064438
Q0140	0.736523	0.00263341
YHR100C	0.737848	0.040496
YHR049W	0.740296	0.00244744
YKR042W	0.742866	0.028566
YNL251C	0.746118	0.00239264
YNL067W	0.749154	0.0239288
YAR073W|YAR075W	0.751817	0.0121758
YJL088W	0.755017	0.00133961
YIR012W	0.755384	0.0453809
YHR091C	0.76185	0.0168129
YNL073W	0.762641	0.00688164
YKL029C	0.763836	0.000237514
YPR113W	0.765921	0.0154338
YNL081C	0.766041	0.0103157
YDL031W	0.768875	0.0173947
YDL104C	0.770138	0.0202617
YML025C	0.772017	0.000714295
YLL013C	0.774316	0.00322973
YFR049W	0.774592	0.00832964
YGL054C	0.775148	0.0458131
YDR297W	0.78101	0.0296479
YER009W	0.781525	0.0404729
YDR194C	0.78515	0.0032943
YHL004W	0.785747	0.00121594
YPL120W	0.788603	0.043001
YMR241W	0.788971	0.0002237
YEL066W	0.789092	0.00993437
YJL178C	0.798651	0.00680203
YDR266C	0.803465	0.0209867
YJR075W	0.803888	0.0083153
YJL183W	0.805376	0.000291628
YER095W	0.807057	0.00160241
YFR041C	0.809181	0.0328045
YJR100C	0.809704	0.0305275
YJR101W	0.810972	0.00115824
YNL306W	0.812268	0.00400591
YOR145C	0.814657	0.0267797
YDR120C	0.816605	0.000228919
YDR054C	0.817804	0.0187505
YLR292C	0.826764	0.0316647
YPR067W	0.828855	0.0256234
YMR076C	0.82959	0.0151103
YER168C	0.831724	0.00922929
YOR316C	0.836015	0.0130918
GTK30I00160	0.836985	0.0233914
YIL062C	0.840379	0.0056162
YMR267W	0.846172	0.0111843
YBR044C	0.846908	0.00021772
YNL100W	0.854004	0.000374766
YBL016W	0.856594	0.00381686
YOR370C	0.857633	0.000461606
YEL042W	0.864234	6.60515e-05
YKL087C	0.873697	0.000629259
YDR508C	0.876976	0.004461
YPL132W	0.891271	0.000497458
YDR228C	0.898641	0.0121758
YOR171C	0.899603	0.00237778
YLR253W	0.903116	0.0465822
YLR274W	0.909707	0.0301708
YGR021W	0.910591	0.0247166
YEL071W	0.915148	0.00025151
YHR103W	0.919134	0.00274638
YDR381C-A	0.929929	0.0233914
YDR044W	0.93516	0.000134059
YGR284C	0.940233	0.000215596
YOR320C	0.940389	0.00532603
YLR380W	0.94232	5.78219e-06
YPL059W	0.943046	1.98462e-05
YHR143W-A	0.94327	0.00237652
YGR257C	0.94587	0.0425648
YGR111W	0.948111	0.000466971
YKR087C	0.95147	0.0191487
YOL052C	0.955624	0.00116259
YDR033W	0.966363	5.91627e-05
YIL053W	0.970034	0.00658406
GTK30O04200;GTK30B01620	0.971201	0.0239288
YJL096W	0.971696	0.000864089
YDR079W	0.974993	0.00303417
YIL026C	0.977642	0.0298734
YPR037C	0.982226	0.0168129
YPL117C	0.982479	6.01333e-05
YPR166C	0.985722	0.00770837
YER159C	0.994741	7.71272e-05
YBR177C	0.996455	4.43349e-06
YML110C	1.00059	8.52579e-06
YCL057C-A	1.0056	0.0100406
YBL059C-A	1.00749	0.000217355
YOR057W	1.00829	0.00400591
YPR020W	1.00949	0.000214823
YPL088W	1.01603	0.00520881
YNL002C	1.0265	1.50831e-06
YDR286C	1.02737	0.0252907
R0040C	1.03312	0.038937
YJR092W	1.03703	0.0298734
YBR262C	1.03963	0.000123902
YBL080C	1.04995	0.000538448
YDR385W	1.05221	0.00119281
YGR147C	1.06276	0.000159676
YJL180C	1.06404	8.05893e-05
YHR063C	1.07	1.51554e-05
YGL241W	1.08132	0.0335698
YBL033C	1.08324	6.20689e-06
YOL115W;YNL299W	1.08675	0.000394572
YDR216W	1.09089	0.00688164
YFL021W	1.09507	0.03014
YLR043C	1.10067	0.00479657
YPR035W	1.10212	5.89494e-06
YGL171W	1.10334	0.0014377
YJR042W	1.11264	0.0014958
YPL093W	1.11284	5.78219e-06
YDR130C	1.11487	0.000376135
YPR182W	1.11937	0.0298734
YLL011W	1.13084	0.0369368
YOL053W	1.13243	0.00458519
YER073W	1.13302	0.00137651
YOR037W	1.1331	0.00993437
YHR137W	1.15076	0.000134059
YER062C	1.15085	0.000215596
YBL085W	1.15668	0.00670507
YOL124C	1.16701	0.00177244
YDR322C-A	1.17757	0.00123998
YPR011C	1.1967	0.0225052
YKL201C	1.19909	1.54854e-05
YMR098C	1.20145	0.000164016
YNR053C	1.21745	3.27147e-07
YNR037C	1.24021	6.17209e-07
YOR196C	1.25442	6.76375e-07
YDR465C	1.25912	0.000758479
YDL181W	1.26395	1.61933e-06
YBR028C	1.27342	0.0370096
YBR233W	1.27876	0.000322543
YGR287C;Homologue_YGR292W	1.28283	0.000281402
YLR017W	1.29481	3.39878e-08
YOL071W	1.30373	1.98462e-05
YDR204W	1.322	0.005342
YNL153C	1.3266	5.77835e-07
YOR125C	1.33654	0.00514805
YKL046C	1.34005	3.3462e-05
YGR255C	1.35578	0.00290047
YGR245C	1.36102	0.00381686
YML129C	1.37451	0.0493005
YDL021W	1.39147	8.21836e-10
YMR002W	1.39288	1.45838e-05
YPR073C	1.40124	8.81606e-08
YBR202W	1.41904	0.000738253
YNL259C	1.4369	4.72393e-05
YJR085C	1.43876	3.40097e-05
YGR020C	1.45187	2.21758e-08
YDR040C	1.49098	0.0123199
YPR188C	1.5083	0.000151945
YDR511W	1.53268	5.0587e-12
YGR179C	1.61121	0.0303476
YHR088W	1.61239	9.51959e-08
YML009C	1.61653	6.06876e-08
YDR377W	1.65499	4.02288e-15
YGL057C	1.6556	1.70339e-07
YHR092C	1.66451	0.000621346
YHR005C-A	1.66816	9.40354e-06
YGR229C	1.67712	8.52113e-10
YDL236W	1.692	6.5813e-13
YKL003C	1.718	0.000561628
YLL018C-A	1.71858	8.24535e-05
YGL068W	1.72751	3.11613e-13
YPR124W	1.7277	0.00299823
YLR068W;REV__YLR291C	1.73301	4.94937e-06
YJL122W	1.73372	1.30291e-09
YLR395C	1.74508	1.29703e-08
YGR032W	1.7761	1.15395e-10
YHR001W-A	1.80417	2.89283e-08
YLR435W	1.80479	3.96774e-08
YNL052W	1.81211	2.57506e-11
YKL192C	1.81469	2.37319e-08
YMR285C	1.82736	3.59658e-05
YJR135W-A	1.83797	6.23133e-05
YPR010C-A	1.8439	4.02288e-15
YPL109C	1.85317	0.0318187
YGL191W	1.87462	1.09611e-09
YAL039C	1.88291	5.08765e-14
YMR015C	1.88569	1.12815e-07
YLR056W	1.9238	3.09372e-15
YPL057C	1.92639	8.10401e-07
YOR348C	1.94279	4.17304e-06
R0020C	1.96784	2.32167e-07
YPL207W	1.9757	7.51563e-06
YGL039W	1.99964	4.51292e-09
YER081W	2.01265	0.000316355
YER048W-A	2.01532	8.68259e-13
YLR201C	2.08603	1.82301e-15
YDR011W	2.08835	5.12605e-10
YCR071C	2.10312	9.90558e-12
YEL020W-A	2.10618	1.65666e-11
YNR034W-A	2.12862	0.00644958
YOL077W-A	2.15112	5.10807e-17
YBR208C	2.15642	9.00419e-07
YDL130W-A	2.15908	6.23834e-07
YLR038C	2.17031	6.0644e-10
YGL055W	2.18067	6.34505e-18
YER070W	2.21466	1.49289e-19
YJL166W	2.21698	3.80382e-21
YMR291W	2.34608	8.68841e-14
YMR256C	2.3473	3.96896e-05
YDR507C	2.36259	8.66207e-10
YGL236C	2.37152	1.13507e-12
YGR292W;YBR299W	2.43378	1.77004e-13
YDL067C	2.65086	8.02369e-10
YBR085C-A	2.65198	4.18951e-06
YLR342W	2.66887	2.94346e-22
YKR052C	2.67832	8.21836e-10
YLR295C	2.73165	8.1128e-24
YGR181W	2.73832	3.87944e-12
YLR411W	2.74962	3.80459e-06
YGR060W	2.76353	1.1243e-05
YOR283W	2.89595	6.31395e-23
YGR037C	2.89707	3.11582e-18
GTK30G03460;GTK30X00120;GTK30D03460|GTK30D03470	2.91911	2.80989e-27
YPL271W	2.98727	4.02288e-15
YMR058W	3.00614	6.57629e-06
YBR269C	3.09653	1.73816e-08
YBR265W	3.37403	6.56252e-17
GTK30N00600	3.57259	9.25057e-11
GTK30J01230;GTK30R00130;GTK30L03860;GTK30L03870	3.7531	1.00164e-14
YML081C-A	4.06151	7.04491e-18
YOR153W	4.30064	1.1736e-06
YDR232W	4.407	3.9146e-19
YEL046C	4.44948	1.34983e-35
YPL058C	4.50675	0.00238057
YMR272C	4.62559	3.64158e-11

## Sheet: isu1D hog1Dvsisu1D
S4 Appendix. EdgeR Log2-fold changes and FDRs for pair-wise protein abundance comparisons between yeast strains grown in YPX aerobic.
Protein	log2 FC (Y22-3MR hog1D isu1D/Y22-3MR isu1D)	FDR (Y22-3MR hog1D isu1D vs. Y22-3MR isu1D)
YMR107W	-7.73848	0.0411389
YKL096W	-7.60975	1.81e-16
YHR096C	-6.57475	7.51e-15
YLR377C	-5.40101	1.92e-06
YMR303C	-4.77327	0.000343454
YAL054C	-4.60564	0.000334588
YMR169C	-4.37792	1.75e-19
YGR088W	-3.96719	5.92e-16
YGR256W	-3.87872	8.08e-07
YOL151W	-3.85104	6.14e-31
YOL126C	-3.7621	1.32e-10
YPR001W	-3.55161	6.81e-07
YOR100C	-3.50279	0.000224947
YGR043C	-3.27756	3.14e-09
YER024W	-3.27591	2.54e-09
YPR006C	-3.21257	6.95e-11
YML131W	-2.99796	1.75e-23
YPR026W	-2.94953	5.91e-13
YPL109C	-2.88423	0.00116925
YDR070C	-2.6588	2.51e-11
YMR011W	-2.51583	8.2e-06
YCL064C	-2.47146	0.00858817
YOR084W	-2.20395	3.96e-17
YNR002C	-2.13997	0.00858817
YGR287C;Homologue_YGR292W	-2.13219	4.85e-10
GTK30J00270	-1.966	3.8e-08
YOR374W	-1.95472	0.000390601
YAL062W	-1.93645	0.00614205
YDR262W	-1.93155	0.000889561
YNL202W	-1.84469	2.09e-08
YPL222W	-1.81787	7.83e-06
YMR174C	-1.80364	8.06e-06
YGR248W	-1.7198	7.16e-08
YLR300W	-1.71908	1.35e-12
YBR139W	-1.7102	5.49e-05
YJR095W	-1.64296	9.67e-09
YHR092C	-1.49436	0.00776493
YDR533C	-1.47414	0.000561188
YLR284C	-1.44786	0.00776493
YOR348C	-1.40389	0.00476342
YHR030C	-1.34971	6.98e-10
YIL053W	-1.33962	0.000196795
YBR280C	-1.31487	0.000334588
YLR348C	-1.30914	0.00237643
YDR368W	-1.30682	4.57e-09
YHL032C	-1.30222	0.00048837
YGR127W	-1.27741	0.00469546
YJR019C	-1.26467	1.12e-06
YJR096W	-1.224	3.71e-05
YOR173W	-1.17832	2.04e-06
YPR049C	-1.17344	0.0290163
YLL032C	-1.16578	0.0194833
YPL113C	-1.15332	0.00546885
YMR090W	-1.11158	1.85e-06
YGL037C	-1.08692	5e-08
YOR054C	-1.04658	0.0357424
YGL156W	-1.04258	0.000553227
YKR049C	-1.04038	0.00209641
YMR247C	-1.01881	0.0103325
YNL108C	-0.97971	0.0196609
YOL147C	-0.975702	0.00173942
YPR127W	-0.957777	0.00755734
YKR076W	-0.931626	0.00113224
YIR038C	-0.915452	0.000561188
YMR170C	-0.904463	0.0263732
YMR304W	-0.865695	0.00388601
YKL201C	-0.860752	0.0108828
YML070W	-0.772874	0.00173942
YNR034W	-0.768898	0.010869
YBR046C	-0.722552	0.0194833
YOR095C	-0.71913	0.00776493
YML004C	-0.683541	0.0207538
YBR169C	-0.652137	0.0426782
YLR270W	-0.645974	0.0130373
CpXylA	-0.0331287	0
YLR056W	0.685692	0.0493614
YLL052C;YPR192W	0.701538	0.0197716
YER044C	0.73342	0.038267
YGL101W	0.743944	0.013371
YER141W	0.756349	0.0106407
YCL018W	0.770839	0.00198708
YEL071W	0.791205	0.00662271
YPR035W	0.807073	0.00550807
YNL111C	0.810562	0.00457449
YGL055W	0.827648	0.00988673
YMR202W	0.837313	0.0033787
YGL125W	0.861238	0.00259047
YCR026C	0.919556	0.0258422
YEL046C	0.948024	0.0415483
YGR202C	0.949238	0.0262727
YBR145W	1.02446	0.00557009
YBR177C	1.05407	2.42e-06
YKL120W	1.11026	0.0353315
YDR216W	1.13776	0.0130373
YBR097W	1.16588	0.0455107
YCL025C	1.19138	0.0319274
YHR018C	1.24216	2.36e-08
YER053C	1.24536	0.0038508
GTK30G03460;GTK30X00120;GTK30D03460|GTK30D03470	1.33447	2.58e-06
YFR015C	1.34145	4.85e-10
YJR073C	1.43095	0.013173
YER001W	1.47941	0.00350308
YBR208C	1.54619	0.00237643
GTK30J01230;GTK30R00130;GTK30L03860;GTK30L03870	1.60427	0.00460295
YGR157W;REV__YGL134W	1.80325	0.00513071
YIL015W	2.10727	5.84e-11
YGL067W	3.62889	0.00780753
kanR	5.60269	2.67e-08
